# Supplementary material for: Effects of growing Coptis chinensis Franch in the natural understory vs. under a manmade scaffold on its growth, alkaloid contents, and rhizosphere soil microenvironment
Source: PeerJ. 2022 Jul 20;10:e13676. doi: 10.7717/peerj.13676 (PMC9308463; doi:10.7717/peerj.13676)
Supplement: Supplemental Information 1 [file peerj-10-13676-s001.xlsx]

## Sheet: (s-PPO)
Number	Sample number	OD	s-PPO activity
			（mg/d/g）
1	ML1-1	0.186	24.759			ML1	ML2	ML3	ML4	ML5
2	ML1-2	0.175	23.318			24.759	14.017	15.065	20.96	20.96
3	ML1-3	0.168	22.401	23.4927		23.318	19.257	22.008	23.449	22.008
4	Md1-1	0.194	25.807			22.401	27.248	19.781	20.567	19.912
5	Md1-2	0.135	18.078
6	Md1-3	0.137	18.34	20.7417		Summary statistics
7	ML2-1	0.104	14.017				N	mean value		standard deviation
8	ML2-2	0.144	19.257				statistic	statistic	Standard error	statistic
9	ML2-3	0.205	27.248	20.174		VAR00001	3	23.4927	0.686276	1.18866
10	Md2-1	0.202	26.855			VAR00002	3	20.174	3.84688	6.663
11	Md2-2	0.197	26.2			VAR00003	3	18.9513	2.04675	3.54508
12	Md2-3	0.189	25.152	26.069		VAR00004	3	21.6587	0.902327	1.56288
13	ML3-1	0.112	15.065			VAR00005	3	20.96	0.605063	1.048
14	ML3-2	0.165	22.008			有效的 N （列表状态）	3
15	ML3-3	0.148	19.781	18.9513
16	Md3-1	0.112	15.065
17	Md3-2	0.149	19.912			Md1	Md2	Md3	Md4	Md5
18	Md3-3	0.135	18.078	17.685		25.807	26.855	15.065	15.72	19.257
19	ML4-1	0.157	20.96			18.078	26.2	19.912	19.388	22.663
20	ML4-2	0.176	23.449			18.34	25.152	18.078	22.27	18.471
21	ML4-3	0.154	20.567	21.6587
22	Md4-1	0.117	15.72			Summary statistics
23	Md4-2	0.145	19.388				N	mean value		standard deviation
24	Md4-3	0.167	22.27	19.126			statistic	statistic	Standard error	statistic
25	ML5-1	0.157	20.96			VAR00001	3	20.7417	2.5338	4.38866
26	ML5-2	0.165	22.008			VAR00002	3	26.069	0.495958	0.859024
27	ML5-3	0.149	19.912	20.96		VAR00003	3	17.685	1.41294	2.44728
28	Md5-1	0.144	19.257			VAR00004	3	19.126	1.89535	3.28285
29	Md5-2	0.17	22.663			VAR00005	3	20.1303	1.2865	2.22828
30	Md5-3	0.138	18.471	20.1303		有效的 N （列表状态）	3
							natural understory	manmade scaffolding	Standard error	Standard error
						1 year	23.4927	20.7417	0.686276	2.5338
						2 years	20.174	26.069	3.84688	0.495958
						3 years	18.9513	17.685	2.04675	1.41294
						4 years	21.6587	19.126	0.902327	1.89535
						5 years	20.96	20.1303	0.605063	1.2865
											treament	mean value	0.05	0.01
						ML1	24.759	23.318	22.401		MD2	26.07	a	A
						ML2	14.017	19.257	27.248		ML1	23.49	ab	A
						ML3	15.065	22.008	19.781		ML4	21.66	ab	A
						ML4	20.96	23.449	20.567		ML5	20.96	ab	A
						ML5	20.96	22.008	19.912		MD1	20.74	ab	A
						Md1	25.807	18.078	18.34		ML2	20.17	ab	A
						Md2	26.855	26.2	25.152		MD4	20.13	ab	A
						Md3	15.065	19.912	18.078		MD4	19.13	b	A
						Md4	15.72	19.388	22.27		ML3	18.95	b	A
						Md5	19.257	22.663	18.471		MD3	17.68	b	A
							Source of variation	free degree	Sum of squares	mean square	Ｆ	Ｆ0.05	Ｆ0.01
							treament	9	157.33	17.48	1.69	2.39	3.46
							error	20	207.29	10.36
							Total variation	29	364.63
																		ab

## Sheet: （s-DHA）
Number	Sample number	OD	s-DHAactivity
			（μg/g/d）
1	ML1-1	0.03	29.0027
2	ML1-2	0.033	30.4244			ML1	ML2	ML3	ML4	ML5
3	ML1-3	0.029	28.5288	29.3186		29.0027	36.5851	30.4244	44.1675	45.1153
4	Md1-1	0.046	36.5851			30.4244	35.1634	54.1194	36.5851	40.3763
5	Md1-2	0.049	38.0068			28.5288	43.6936	33.7417	55.5411	49.8543
6	Md1-3	0.058	42.2719	38.9546
7	ML2-1	0.046	36.5851
8	ML2-2	0.043	35.1634			Summary statistics
9	ML2-3	0.061	43.6936	38.4807				statistic	Standard error	Bootstrapa
10	Md2-1	0.037	32.32							deviation	Standard error	95% confidence interval
11	Md2-2	0.045	36.1112									lower limit	upper limit
12	Md2-3	0.039	33.2678	33.8997		ML1	N	3		0	0	3	3
13	ML3-1	0.033	30.4244				mean value	29.3186	0.569557	0.0099519	0.483243	28.5288	30.4244
14	ML3-2	0.083	54.1194			ML2	N	3		0	0	3	3
15	ML3-3	0.04	33.7417	39.4285			mean value	38.4807	2.63856	-0.0099519	2.20423	35.1634	43.6936
16	Md3-1	0.048	37.5329			ML3	N	3		0	0	3	3
17	Md3-2	0.055	40.8502				mean value	39.4285	7.40761	0.165865	6.2273	30.4244	54.1194
18	Md3-3	0.048	37.5329	38.6387		ML4	N	3		0	0	3	3
19	ML4-1	0.062	44.1675				mean value	45.4312	5.50849	-0.0530768	4.64974	36.5851	55.5411
20	ML4-2	0.046	36.5851			ML5	N	3		0	0	3	3
21	ML4-3	0.086	55.5411	45.4312			mean value	45.1153	2.73606	-0.033173	2.31663	40.3763	49.8543
22	Md4-1	0.052	39.4285			Valid N (list status)	N	3		0	0	3	3
23	Md4-2	0.046	36.5851
24	Md4-3	0.058	42.2719	39.4285
25	ML5-1	0.064	45.1153
26	ML5-2	0.054	40.3763			Md1	Md2	Md3	Md4	Md5
27	ML5-3	0.074	49.8543	45.1153		36.5851	32.32	37.5329	39.4285	39.9024
28	Md5-1	0.053	39.9024			38.0068	36.1112	40.8502	36.5851	42.7458
29	Md5-2	0.059	42.7458			42.2719	33.2678	37.5329	42.2719	41.798
30	Md5-3	0.057	41.798	41.4821
						Summary statistics
								statistic	Standard error	Bootstrapa
										deviation	Standard error	95% confidence interval
												lower limit	upper limit
						ML1	N	3		0	0	3	3
							mean value	38.9546	1.70867	-0.0312774	1.36017	36.5851	42.2719
						ML2	N	3		0	0	3	3
							mean value	33.8997	1.13911	-0.0123214	0.907765	32.32	36.1112
						ML3	N	3		0	0	3	3
							mean value	38.6387	1.10577	-0.0066346	0.875297	37.5329	40.8502
						ML4	N	3		0	0	3	3
							mean value	39.4285	1.64164	-0.0085302	1.28942	36.5851	42.2719
						ML5	N	3		0	0	3	3
							mean value	41.4821	0.835881	-0.0151648	0.673779	39.9024	42.7458
						Valid N (list status)	N	3		0	0	3	3
							natural understory	manmade scaffolding	Standard error	Standard error
						1 year	29.3186	38.9546	0.569557	1.70867
						2 years	38.4807	33.8997	2.63856	1.13911
						3 years	39.4285	38.6387	7.40761	1.10577
						4 years	45.4312	39.4285	5.50849	1.64164
						5 years	45.1153	41.4821	2.73606	0.835881
											treament	mean value	0.05	0.01
											ML4	45.43	a	A	ML1
											ML5	45.12	a	A	ML2
											MD5	41.48	ab	AB	ML3
											ML3	39.43	abc	AB	ML4
											MD4	39.43	abc	AB	ML5
											MD1	38.95	abc	AB	Md1
											MD3	38.64	abc	AB	Md2
											ML2	38.48	abc	AB	Md3
											MD2	33.9	bc	AB	Md4
											ML1	29.32	c	B	Md5
							ML1	29.0027	30.4244	28.5288
							ML2	36.5851	35.1634	43.6936		Source of variation	free degree	Sum of squares	mean square	Ｆ	Ｆ0.05	Ｆ0.01
							ML3	30.4244	54.1194	33.7417		treament	9	616.28	68.48	2.1	2.39	3.46
							ML4	44.1675	36.5851	55.5411		error	20	652.93	32.65
							ML5	45.1153	40.3763	49.8543		Total variation	29	1269.21
							Md1	36.5851	38.0068	42.2719
							Md2	32.32	36.1112	33.2678
							Md3	37.5329	40.8502	37.5329
							Md4	39.4285	36.5851	42.2719
							Md5	39.9024	42.7458	41.798

## Sheet: （s-CAT）
Number	Sample number	OD	s-CAT activity				ML1	ML2	ML3	ML4	ML5
			（μmol/d/g ）				9.8091	7.6734	7.2198	8.1648	9.9792
							7.0686	7.7868	8.9208	7.8246	8.3349
1	ML1-1	1.679	9.8091				6.6717	11.6235	8.2971	10.2627	10.0737
2	ML1-2	1.791	7.0686
3	ML1-3	1.826	6.6717	7.8498			Summary statistics
4	Md1-1	1.464	14.7609						statistic	Standard error	Bootstrapa
5	Md1-2	1.583	11.0943								deviation	Standard error	95% confidence interval
6	Md1-3	1.587	11.8125	12.5559									lower limit	upper limit
7	ML2-1	1.763	7.6734				ML1	N	3		0	0	3	3
8	ML2-2	1.745	7.7868					mean value	7.8498	0.986327	0.0065646	0.786996	6.6717	9.8091
9	ML2-3	1.599	11.6235	9.0279			ML2	N	3		0	0	3	3
10	Md2-1	1.263	17.0478					mean value	9.0279	1.29821	-0.028287	1.03953	7.6734	11.6235
11	Md2-2	1.451	14.6664				ML3	N	3		0	0	3	3
12	Md2-3	1.653	11.6802	14.4648				mean value	8.1459	0.496822	0.0023058	0.402477	7.2198	8.9208
13	ML3-1	1.767	7.2198				ML4	N	3		0	0	3	3
14	ML3-2	1.702	8.9208					mean value	8.7507	0.762352	-0.0174258	0.613432	7.8246	10.2627
15	ML3-3	1.741	8.2971	8.1459			ML5	N	3		0	0	3	3
16	Md3-1	1.745	9.7146					mean value	9.4626	0.56451	-0.0105588	0.463563	8.3349	10.0737
17	Md3-2	1.625	12.1149				Valid N (list status)	N	3		0	0	3	3
18	Md3-3	1.831	8.9586	10.2627
19	ML4-1	1.8	8.1648				Md1	Md2	Md3	Md4	Md5
20	ML4-2	1.815	7.8246				14.7609	17.0478	9.7146	9.45	10.0548
21	ML4-3	1.75	10.2627	8.7507			11.0943	14.6664	12.1149	6.5961	8.9019
22	Md4-1	1.786	9.45				11.8125	11.6802	8.9586	12.474	8.1081
23	Md4-2	1.859	6.5961
24	Md4-3	1.61	12.474	9.5067			Summary statistics
25	ML5-1	1.666	9.9792						statistic	Standard error	Bootstrapa
26	ML5-2	1.729	8.3349								deviation	Standard error	95% confidence interval
27	ML5-3	1.627	10.0737	9.4626									lower limit	upper limit
28	Md5-1	1.694	10.0548				ML1	N	3		0	0	3	3
29	Md5-2	1.691	8.9019					mean value	12.5559	1.12182	-0.0475524	0.896143	11.0943	14.7609
30	Md5-3	1.705	8.1081	9.0216			ML2	N	3		0	0	3	3
								mean value	14.4648	1.55277	-0.0608076	1.25708	11.6802	17.0478
							ML3	N	3		0	0	3	3
								mean value	10.2627	0.951467	0.0078498	0.769812	8.9586	12.1149
							ML4	N	3		0	0	3	3
								mean value	9.5067	1.69704	0.0090846	1.38036	6.5961	12.474
							ML5	N	3		0	0	3	3
								mean value	9.0216	0.565142	-0.0237888	0.455911	8.1081	10.0548
							Valid N (list status)	N	3		0	0	3	3
								natural understory	manmade scaffolding	Standard error	Standard error
							1 year	7.8498	12.5559	0.986327	1.12182
							2 years	9.0279	14.4648	1.29821	1.55277
							3 years	8.1459	10.2627	0.496822	0.951467
							4 years	8.7507	9.5067	0.762352	1.69704
							5 years	9.4626	9.0216	0.56451	0.565142
														treament	mean value	0.05	0.01
														MD2	14.46	a	A	ML1
														MD1	12.56	ab	AB	ML2
														MD3	10.26	bc	AB	ML3
														MD4	9.51	bc	B	ML4
														ML5	9.46	bc	B	ML5
														ML2	9.03	c	B	Md1
														MD5	9.02	c	B	Md2
														ML4	8.75	c	B	Md3
														ML3	8.15	c	B	Md4
														ML1	7.85	c	B	Md5
									ML1	9.8091	7.0686	6.6717		Source of variation	free degree	Sum of squares	mean square	Ｆ	Ｆ0.05	Ｆ0.01
									ML2	7.6734	7.7868	11.6235		treament	9	115.51	12.83	3.69	2.39	3.46
									ML3	7.2198	8.9208	8.2971		error	20	69.47	3.47
									ML4	8.1648	7.8246	10.2627		Total variation	29	184.98
									ML5	9.9792	8.3349	10.0737
									Md1	14.7609	11.0943	11.8125
									Md2	17.0478	14.6664	11.6802
									Md3	9.7146	12.1149	8.9586
									Md4	9.45	6.5961	12.474
									Md5	10.0548	8.9019	8.1081

## Sheet: (s-POD)
Number	Sample number	OD	POD activity
			（U/g）
1	ML1-1	0.652	85.805			ML1	ML2	ML3	ML4	ML5
2	ML1-2	0.669	88.032			85.805	77.29	93.796	69.037	71.919
3	ML1-3	0.651	85.674	86.5037		88.032	78.731	77.028	74.801	78.993
4	Md1-1	0.608	80.041			85.674	69.43	76.504	54.496	65.893
5	Md1-2	0.622	81.875
6	Md1-3	0.67	88.163	83.3597		Summary statistics
7	ML2-1	0.587	77.29				N	mean value		standard deviation
8	ML2-2	0.598	78.731				statistic	statistic	Standard error	statistic
9	ML2-3	0.527	69.43	75.1503		VAR00001	3	86.5037	0.765102	1.3252
10	Md2-1	0.495	65.238			VAR00002	3	75.1503	2.89026	5.00607
11	Md2-2	0.369	48.732			VAR00003	3	82.4427	5.67868	9.83577
12	Md2-3	0.458	60.391	58.1203		VAR00004	3	66.1113	6.04133	10.4639
13	ML3-1	0.713	93.796			VAR00005	3	72.2683	3.78568	6.55698
14	ML3-2	0.585	77.028			Valid N (list status)	3
15	ML3-3	0.581	76.504	82.4427
16	Md3-1	0.609	80.172			Md1	Md2	Md3	Md4	Md5
17	Md3-2	0.565	74.408			80.041	65.238	80.172	58.819	75.325
18	Md3-3	0.545	71.788	75.456		81.875	48.732	74.408	81.744	71.133
19	ML4-1	0.524	69.037			88.163	60.391	71.788	69.954	81.22
20	ML4-2	0.568	74.801
21	ML4-3	0.413	54.496	66.1113		Summary statistics
22	Md4-1	0.446	58.819				N	mean value		standard deviation
23	Md4-2	0.621	81.744				statistic	statistic	Standard error	statistic
24	Md4-3	0.531	69.954	70.1723		VAR00001	3	83.3597	2.45933	4.25968
25	ML5-1	0.546	71.919			VAR00002	3	58.1203	4.89826	8.48404
26	ML5-2	0.6	78.993			VAR00003	3	75.456	2.47633	4.28912
27	ML5-3	0.5	65.893	72.2683		VAR00004	3	70.1723	6.61878	11.4641
28	Md5-1	0.572	75.325			VAR00005	3	75.8927	2.92567	5.0674
29	Md5-2	0.54	71.133			Valid N (list status)	3
30	Md5-3	0.617	81.22	75.8927
							natural understory	manmade scaffolding	Standard error	Standard error
						1 year	86.5037	83.3597	0.765102	2.45933
						2 years	75.1503	58.1203	2.89026	4.89826
						3 years	82.4427	75.456	5.67868	2.47633
						4 years	66.1113	70.1723	6.04133	6.61878
						5 years	72.2683	75.8927	3.78568	2.92567
										treament	mean value	0.05	0.01
										ML1	86.5	a	A
										MD1	83.36	ab	AB
										ML3	82.44	ab	AB
										MD5	75.89	abc	ABC
										MD3	75.46	abc	ABC
										ML2	75.15	abc	ABC
										ML5	72.27	bc	ABC
										MD4	70.17	bcd	ABC
										ML4	66.11	cd	BC
										MD2	58.12	d	C
						ML1	85.805	88.032	85.674		Source of variation	free degree	Sum of squares	mean square	Ｆ	Ｆ0.05	Ｆ0.01
						ML2	77.29	78.731	69.43		treament	9	1953.88	217.1	4.01	2.39	3.46
						ML3	93.796	77.028	76.504		error	20	1083.34	54.17
						ML4	69.037	74.801	54.496		Total variation	29	3037.22
						ML5	71.919	78.993	65.893
						Md1	80.041	81.875	88.163
						Md2	65.238	48.732	60.391
						Md3	80.172	74.408	71.788
						Md4	58.819	81.744	69.954
						Md5	75.325	71.133	81.22
																		ML1	a
																		ML2	abc
																		ML3	ab
																		ML4	cd
																		ML5	bc
																		Md1	ab
																		Md2	d
																		Md3	abc
																		Md4	bcd
																		Md5	abc

## Sheet: （s-NPT）
Number	Sample number	OD	contrastOD	s-NPT activity（mg/d/g）
		0.371					ML1	ML2	ML3	ML4	ML5
1	ML1-1	0.088	0.067	2.717			2.717	1.8113	2.4582	1.6819	2.4582
2	ML1-2	0.084	0.069	1.9407			1.9407	1.6819	2.9757	1.2938	3.8814
3	ML1-3	0.1	0.074	3.3639	2.67387		3.3639	3.8814	1.1644	1.4232	1.1644
4	Md1-1	0.097	0.079	2.3288
5	Md1-2	0.1	0.076	3.1051			Summary statistics
6	Md1-3	0.091	0.075	2.0701	2.50133			N	mean value		standard deviation
7	ML2-1	0.085	0.071	1.8113				statistic	statistic	Standard error	statistic
8	ML2-2	0.084	0.071	1.6819			VAR00001	3	2.67387	0.411408	0.71258
9	ML2-3	0.104	0.074	3.8814	2.4582		VAR00002	3	2.4582	0.71258	1.23422
10	Md2-1	0.09	0.076	1.8113			VAR00003	3	2.19943	0.538647	0.932964
11	Md2-2	0.1	0.08	2.5876			VAR00004	3	1.4663	0.114089	0.197607
12	Md2-3	0.087	0.078	1.1644	1.85443		VAR00005	3	2.50133	0.784627	1.35901
13	ML3-1	0.08	0.061	2.4582			Valid N (list status)	3
14	ML3-2	0.096	0.073	2.9757
15	ML3-3	0.087	0.078	1.1644	2.19943		Md1	Md2	Md3	Md4	Md5
16	Md3-1	0.097	0.085	1.5526			2.3288	1.8113	1.5526	1.8113	3.6226
17	Md3-2	0.105	0.092	1.6819			3.1051	2.5876	1.6819	3.2345	1.4232
18	Md3-3	0.09	0.082	1.035	1.42317		2.0701	1.1644	1.035	1.6819	3.2345
19	ML4-1	0.092	0.079	1.6819
20	ML4-2	0.087	0.077	1.2938			Summary statistics
21	ML4-3	0.09	0.079	1.4232	1.4663			N	mean value		standard deviation
22	Md4-1	0.083	0.069	1.8113				statistic	statistic	Standard error	statistic
23	Md4-2	0.082	0.057	3.2345			VAR00001	3	2.50133	0.310983	0.538639
24	Md4-3	0.091	0.078	1.6819	2.24257		VAR00002	3	1.85443	0.411408	0.71258
25	ML5-1	0.102	0.083	2.4582			VAR00003	3	1.42317	0.19764	0.342322
26	ML5-2	0.107	0.077	3.8814			VAR00004	3	2.24257	0.497371	0.861473
27	ML5-3	0.091	0.082	1.1644	2.50133		VAR00005	3	2.7601	0.677774	1.17394
28	Md5-1	0.107	0.079	3.6226			Valid N (list status)	3
29	Md5-2	0.101	0.09	1.4232
30	Md5-3	0.096	0.071	3.2345	2.7601
												natural understory	manmade scaffolding	Standard error	Standard error
											1 year	2.67387	2.50133	0.411408	0.310983
											2 years	2.4582	1.85443	0.71258	0.411408
											3 years	2.19943	1.42317	0.538647	0.19764
											4 years	1.4663	2.24257	0.114089	0.497371
											5 years	2.50133	2.7601	0.784627	0.677774
							ML1	2.717	1.9407	3.3639		treament	mean value	0.05
							ML2	1.8113	1.6819	3.8814		MD5	2.76	a
							ML3	2.4582	2.9757	1.1644		ML1	2.67	a
							ML4	1.6819	1.2938	1.4232		ML5	2.5	a
							ML5	2.4582	3.8814	1.1644		MD1	2.5	a
							Md1	2.3288	3.1051	2.0701		ML2	2.46	a
							Md2	1.8113	2.5876	1.1644		MD4	2.24	ab
							Md3	1.5526	1.6819	1.035		ML3	2.2	ab
							Md4	1.8113	3.2345	1.6819		MD2	1.85	ab
							Md5	3.6226	1.4232	3.2345		ML4	1.47	b
												MD3	1.42	b
															i

## Sheet: (S-SC)
Number	Sample number	OD	contrastOD	S-SC activity
				（mg/d/g）
1	ML1-1	0.451	0.185	13.5792				ML1	ML2	ML3	ML4	ML5
2	ML1-2	0.388	0.19	10.764				13.5792	17.6364	26.4546	23.7636	21.528
3	ML1-3	0.406	0.285	7.5762	10.6398			10.764	23.2668	22.8528	19.3338	21.942
4	Md1-1	0.603	0.19	19.665				7.5762	11.7576	13.3308	35.1072	26.7444
5	Md1-2	0.633	0.195	20.7
6	Md1-3	0.646	0.192	21.3624	20.5758
7	ML2-1	0.561	0.197	17.6364				Summary statistics
8	ML2-2	0.647	0.147	23.2668						statistic	Standard error	Bootstrapa
9	ML2-3	0.396	0.174	11.7576	17.5536							deviation	Standard error	95% confidence interval
10	Md2-1	0.668	0.186	22.5216										lower limit	upper limit
11	Md2-2	0.679	0.176	23.391				ML1	N	3		0	0	3	3
12	Md2-3	0.5	0.187	15.525	20.4792				均值	10.6398	1.73403	-0.012765	1.40625	7.5762	13.5792
13	ML3-1	0.769	0.192	26.4546				ML2	N	3		0	0	3	3
14	ML3-2	0.681	0.191	22.8528					均值	17.5536	3.32268	0.0434148	2.69988	11.7576	23.2668
15	ML3-3	0.454	0.194	13.3308	20.8794			ML3	N	3		0	0	3	3
16	Md3-1	0.724	0.197	24.3846					均值	20.8794	3.9149	-0.0108882	3.1804	13.3308	26.4546
17	Md3-2	0.572	0.197	18.0918				ML4	N	3		0	0	3	3
18	Md3-3	0.46	0.174	14.4072	18.9612				均值	26.0682	4.69693	-0.0408756	3.82058	19.3338	35.1072
19	ML4-1	0.706	0.194	23.7636				ML5	N	3		0	0	3	3
20	ML4-2	0.594	0.189	19.3338					均值	23.4048	1.67407	-0.0024564	1.36142	21.528	26.7444
21	ML4-3	0.98	0.194	35.1072	26.0682			Valid N (list status)	N	3		0	0	3	3
22	Md4-1	0.81	0.192	28.152
23	Md4-2	0.411	0.19	11.7162				Md1	Md2	Md3	Md4	Md5
24	Md4-3	0.701	0.195	23.5152	21.1278			19.665	22.5216	24.3846	28.152	31.0086
25	ML5-1	0.661	0.203	21.528				20.7	23.391	18.0918	11.7162	22.977
26	ML5-2	0.677	0.209	21.942				21.3624	15.525	14.4072	23.5152	26.9928
27	ML5-3	0.783	0.199	26.7444	23.4048
28	Md5-1	0.894	0.207	31.0086				Summary statistics
29	Md5-2	0.697	0.204	22.977						statistic	Standard error	Bootstrapa
30	Md5-3	0.795	0.205	26.9928	26.9928							deviation	Standard error	95% confidence interval
														lower limit	upper limit
								ML1	N	3		0	0	3	3
									均值	20.5758	0.493917	-0.0128754	0.396189	19.665	21.3624
								ML2	N	3		0	0	3	3
									均值	20.4792	2.48978	0.0256818	1.98813	15.525	23.391
								ML3	N	3		0	0	3	3
									均值	18.9612	2.91285	0.076797	2.33916	14.4072	24.3846
								ML4	N	3		0	0	3	3
									均值	21.1278	4.89246	0.10775	4.12098	11.7162	28.152
								ML5	N	3		0	0	3	3
									均值	26.9928	2.31852	0.060237	1.94769	22.977	31.0086
								Valid N (list status)	N	3		0	0	3	3
																				treament	mean value	0.05	0.01
										natural understory	manmade scaffolding	Standard error	Standard error							MD5	26.99	a	A
									1 year	10.6398	20.5758	1.73403	0.493917							ML4	26.07	a	A
									2 years	17.5536	20.4792	3.32268	2.48978							ML5	23.4	a	AB
									3 years	20.8794	18.9612	3.9149	2.91285							MD4	21.13	a	AB
									4 years	26.0682	21.1278	4.69693	4.89246							ML3	20.88	ab	AB
									5 years	23.4048	26.9928	1.67407	2.31852							MD1	20.58	ab	AB
																				MD2	20.48	ab	AB
																				MD3	18.96	ab	AB
									ML1	13.5792	10.764	7.5762								ML2	17.55	ab	AB
									ML2	17.6364	23.2668	11.7576								ML1	10.64	b	B
									ML3	26.4546	22.8528	13.3308
									ML4	23.7636	19.3338	35.1072
									ML5	21.528	21.942	26.7444				Source of variation	free degree	Sum of squares	mean square	Ｆ	Ｆ0.05	Ｆ0.01
									Md1	19.665	20.7	21.3624				treament	9	570.4	63.38	2.15	2.39	3.46
									Md2	22.5216	23.391	15.525				error	20	590.86	29.54
									Md3	24.3846	18.0918	14.4072				Total variation	29	1161.26
									Md4	28.152	11.7162	23.5152
									Md5	31.0086	22.977	26.9928

## Sheet: （s-NP）
Number	Sample number	contrastOD	s-NP activity
			（μmol/d/g）
	blank	0.065				ML1	ML2	ML3	ML4	ML5
	standard	0.254				14.3466	11.4312	13.1958	14.4616	14.0013
1	ML1-1	0.439	14.3466			14.078	13.8095	14.5	15.037	14.5767
2	ML1-2	0.432	14.078			14.078	14.6151	13.3876	14.8069	13.8862
3	ML1-3	0.432	14.078	14.1675
4	Md1-1	0.446	14.6151			Summary statistics
5	Md1-2	0.395	12.6587				N	mean value		standard deviation
6	Md1-3	0.4	12.8505	13.3748			statistic	statistic	Standard error	statistic
7	ML2-1	0.363	11.4312			VAR00001	3	14.1675	0.0895333	0.155076
8	ML2-2	0.425	13.8095			VAR00002	3	13.2853	0.955758	1.65542
9	ML2-3	0.446	14.6151	13.2853		VAR00003	3	13.6945	0.406555	0.704173
10	Md2-1	0.415	13.4259			VAR00004	3	14.7685	0.16721	0.289616
11	Md2-2	0.428	13.9246			VAR00005	3	14.1547	0.213584	0.369938
12	Md2-3	0.433	14.1164	13.8223		有效的 N （列表状态）	3
13	ML3-1	0.409	13.1958
14	ML3-2	0.443	14.5			Md1	Md2	Md3	Md4	Md5
15	ML3-3	0.414	13.3876	13.6945		14.6151	13.4259	12.8122	13.1958	14.4233
16	Md3-1	0.399	12.8122			12.6587	13.9246	13.2341	13.5794	14.6918
17	Md3-2	0.41	13.2341			12.8505	14.1164	13.0807	14.3082	13.963
18	Md3-3	0.406	13.0807	13.0423
19	ML4-1	0.442	14.4616			Summary statistics
20	ML4-2	0.457	15.037				N	mean value		standard deviation
21	ML4-3	0.451	14.8069	14.7685			statistic	statistic	Standard error	statistic
22	Md4-1	0.409	13.1958			VAR00001	3	13.3748	0.622633	1.07843
23	Md4-2	0.419	13.5794			VAR00002	3	13.8223	0.205788	0.356436
24	Md4-3	0.438	14.3082	13.6945		VAR00003	3	13.0423	0.123294	0.213551
25	ML5-1	0.43	14.0013			VAR00004	3	13.6945	0.326235	0.565056
26	ML5-2	0.445	14.5767			VAR00005	3	14.3594	0.212801	0.368582
27	ML5-3	0.427	13.8862	14.1547		有效的 N （列表状态）	3
28	Md5-1	0.441	14.4233
29	Md5-2	0.448	14.6918				natural understory	manmade scaffolding	Standard error	Standard error
30	Md5-3	0.429	13.963	14.3594		1 year	14.1675	13.3748	0.0895333	0.622633
						2 years	13.2853	13.8223	0.955758	0.205788
						3 years	13.6945	13.0423	0.406555	0.123294
						4 years	14.7685	13.6945	0.16721	0.326235
						5 years	14.1547	14.3594	0.213584	0.212801
						ML1	14.3466	14.078	14.078
						ML2	11.4312	13.8095	14.6151
						ML3	13.1958	14.5	13.3876
						ML4	14.4616	15.037	14.8069
						ML5	14.0013	14.5767	13.8862
						Md1	14.6151	12.6587	12.8505
						Md2	13.4259	13.9246	14.1164
						Md3	12.8122	13.2341	13.0807
						Md4	13.1958	13.5794	14.3082		treament	mean value	0.05	0.01
						Md5	14.4233	14.6918	13.963		处理4	14.77	a	A
											处理10	14.36	ab	A
											处理1	14.17	ab	A
											处理5	14.15	ab	A
											处理7	13.82	ab	A
											处理3	13.69	ab	A
											处理9	13.69	ab	A
											处理6	13.37	ab	A
											处理2	13.29	b	A
											处理8	13.04	b	A
											Source of variation	free degree	Sum of squares	mean square	Ｆ	Ｆ0.05	Ｆ0.01
											treament	9	7.62	0.85	1.61	2.39	3.46
											error	20	10.54	0.53
											Total variation	29	18.17

## Sheet: （s-UE）
Number	Sample number	OD	contrastOD	s-UE activity
				（U/g）
25	ML1-1	0.268	0.107	1696.99				ML1	ML2	ML3	ML4	ML5
26	ML1-2	0.278	0.106	1814.73				1696.99	1333.06	1279.54	1333.06	1193.9
27	ML1-3	0.269	0.122	1547.13	1686.29			1814.73	1204.61	1268.83	1108.27	1279.54
28	Md1-1	0.23	0.103	1333.06				1547.13	1429.39	1118.98	1440.1	1268.83
29	Md1-2	0.26	0.091	1782.62
30	Md1-3	0.241	0.074	1761.21	1625.63			Summary statistics
31	ML2-1	0.224	0.097	1333.06						statistic	Standard error	Bootstrapa
32	ML2-2	0.204	0.089	1204.61								deviation	Standard error	95% confidence interval
33	ML2-3	0.232	0.096	1429.39	1322.35									lower limit	upper limit
34	Md2-1	0.278	0.085	2039.52				ML1	N	3		0	0	3	3
35	Md2-2	0.306	0.08	2392.75					均值	1686.29	77.4342	1.42362	64.3558	1547.13	1814.73
36	Md2-3	0.264	0.085	1889.66	2107.31			ML2	N	3		0	0	3	3
37	ML3-1	0.212	0.09	1279.54					均值	1322.35	65.1095	-0.792091	54.3991	1204.61	1429.39
38	ML3-2	0.207	0.086	1268.83				ML3	N	3		0	0	3	3
39	ML3-3	0.22	0.113	1118.98	1222.45				均值	1222.45	51.8279	1.84465	42.4195	1118.98	1279.54
40	Md3-1	0.224	0.095	1354.46				ML4	N	3		0	0	3	3
41	Md3-2	0.247	0.115	1386.58					均值	1293.81	97.7782	-0.68862	82.008	1108.27	1440.1
42	Md3-3	0.213	0.096	1226.02	1322.35			ML5	N	3		0	0	3	3
43	ML4-1	0.24	0.113	1333.06					均值	1247.42	26.9376	-1.04899	22.4349	1193.9	1279.54
44	ML4-2	0.245	0.139	1108.27				有效的 N （列表状态）	N	3		0	0	3	3
45	ML4-3	0.24	0.103	1440.1	1293.81
46	Md4-1	0.219	0.102	1226.02				Md1	Md2	Md3	Md4	Md5
47	Md4-2	0.197	0.094	1076.16				1333.06	2039.52	1354.46	1226.02	1097.57
48	Md4-3	0.217	0.104	1183.2	1161.79			1782.62	2392.75	1386.58	1076.16	1140.39
49	ML5-1	0.217	0.103	1193.9				1761.21	1889.66	1226.02	1183.2	1204.61
50	ML5-2	0.224	0.102	1279.54
51	ML5-3	0.224	0.103	1268.83	1247.42			Summary statistics
52	Md5-1	0.222	0.117	1097.57						statistic	Standard error	Bootstrapa
53	Md5-2	0.204	0.095	1140.39								deviation	Standard error	95% confidence interval
54	Md5-3	0.197	0.082	1204.61	1147.52									lower limit	upper limit
								ML1	N	3		0	0	3	3
									均值	1625.63	146.418	-1.05612	120.527	1333.06	1782.62
								ML2	N	3		0	0	3	3
									均值	2107.31	149.131	2.41195	123.572	1889.66	2392.75
								ML3	N	3		0	0	3	3
									均值	1322.35	49.0516	0.984762	40.2668	1226.02	1386.58
								ML4	N	3		0	0	3	3
									均值	1161.79	44.564	-0.313982	37.0376	1076.16	1226.02
								ML5	N	3		0	0	3	3
									均值	1147.52	31.1049	-0.542333	25.4073	1097.57	1204.61
								有效的 N （列表状态）	N	3		0	0	3	3
									natural understory	manmade scaffolding	Standard error	Standard error
								1 year	1686.29	1625.63	77.4342	146.418
								2 years	1322.35	2107.31	65.1095	149.131
								3 years	1222.45	1322.35	51.8279	49.0516
								4 years	1293.81	1161.79	97.7782	44.564
								5 years	1247.42	1147.52	26.9376	31.1049
														treament	mean value	0.05	0.01
									ML1	1696.99	1814.73	1547.13		MD2	2107.31	a	A
									ML2	1333.06	1204.61	1429.39		ML1	1686.29	b	B
									ML3	1279.54	1268.83	1118.98		MD1	1625.63	b	BC
									ML4	1333.06	1108.27	1440.1		MD3	1322.35	c	CD
									ML5	1193.9	1279.54	1268.83		ML2	1322.35	c	CD
									Md1	1333.06	1782.62	1761.21		ML4	1293.81	c	CD
									Md2	2039.52	2392.75	1889.66		ML5	1247.42	c	D
									Md3	1354.46	1386.58	1226.02		ML3	1222.45	c	D
									Md4	1226.02	1076.16	1183.2		MD4	1161.79	c	D
									Md5	1097.57	1140.39	1204.61		MD5	1147.52	c	D
									Source of variation	free degree	Sum of squares	mean square	Ｆ	Ｆ0.05	Ｆ0.01
									treament	9	2.48971e+06	276635	12.76	2.39	3.46
									error	20	433472	21673.6
									Total variation	29	2.92319e+06
