# Supplementary material for: Effects of growing Coptis chinensis Franch in the natural understory vs. under a manmade scaffold on its growth, alkaloid contents, and rhizosphere soil microenvironment
Source: PeerJ. 2022 Jul 20;10:e13676. doi: 10.7717/peerj.13676 (PMC9308463; doi:10.7717/peerj.13676)
Supplement: Supplemental Information 2 [file peerj-10-13676-s002.xlsx]

## Sheet: Sheet1
MDL
	Fibrous root length/cm	Plant height/cm	Leaf number	Leaf blade weight/g	Petiole weight/g	Rhizome weight/g	Fibrous root weight/g	Rhizome length/cm	Rhizome diameter/mm		Summary statistics
1	4	7	12	1.1	0.7	0.4	0.8	1.8	4.21			N	minimal value	maximum value	mean value	standard deviation
2	5	8	11	0.9	0.5	0.5	1.1	1.5	3.81		VAR00009	10	2	5	3.7	0.948683	Fibrous root
3	3	6	2	1.1	0.6	1.2	1.8	3.5	4.69		VAR00010	10	6	9	7.3	0.948683	Plant height
4	4	9	8	1.4	0.8	1	3.4	2.5	4.63		VAR00011	10	2	17	8.9	4.38305	Leaf number
5	5	8	11	1.5	0.6	0.6	1.4	2	6.24		VAR00012	10	0.7	1.8	1.18	0.396653	Leaf blade weigh
6	3	7	17	1.8	0.5	0.2	0.9	2	1.92		VAR00013	10	0.3	0.8	0.53	0.163639	Petiole weight
7	4	7	9	1.7	0.6	1.2	2.7	2.5	5.07		VAR00014	10	0.2	1.2	0.71	0.344642	Rhizome weight
8	4	6	10	0.8	0.4	0.5	1.1	2	4.79		VAR00015	10	0.8	3.4	1.55	0.855375	Fibrous root weight
9	3	8	4	0.8	0.3	0.6	1.3	3.5	3.88		VAR00016	10	1.5	3.5	2.4	0.681502	Rhizome length
10	2	7	5	0.7	0.3	0.9	1	2.7	6.697		VAR00017	10	1.92	6.697	4.5937	1.32621	Rhizome diameter
mean value	3.7	7.3	8.9	1.18	0.53	0.71	1.55	2.4	4.5937		Valid N (list status)	10
MD2
	Fibrous root length/cm	Plant height/cm	Leaf number	Leaf blade weight/g	Petiole weight/g	Rhizome weight/g	Fibrous root weight/g	Rhizome length/cm	Rhizome diameter/mm		Summary statistics
1	5	14	13	3	1.6	2.9	1.7	5.8	7.28			N	minimal value	maximum value	mean value	standard deviation
2	8	14	18	5.1	1.8	2.3	5.5	5.4	5.47		VAR00009	10	3	9	6.6	1.95505	Fibrous root
3	7	10	25	4.4	1.4	1.7	3.9	3.6	4.25		VAR00010	10	8	14	10.6	2.01108	Plant height
4	3	9	17	3.2	1.4	5.2	2.2	5.7	6.22		VAR00011	10	13	39	23.4	8.34266	Leaf number
5	8	11	39	6.7	3.3	7.9	10	6.8	6.99		VAR00012	10	2.9	6.7	4.37	1.31997	Leaf blade weigh
6	9	10	35	5.5	2.7	5	7.2	4.9	9.03		VAR00013	10	1.1	3.3	1.82	0.689283	Petiole weight
7	8	9	28	4.8	1.8	5.3	6	5.2	8.67		VAR00014	10	1.7	7.9	4.12	2.00433	Rhizome weight
8	7	10	18	5.2	1.9	5.8	4.6	5.5	8.2		VAR00015	10	1.7	10	4.84	2.4627	Fibrous root weight
9	4	8	20	2.9	1.1	2.8	3.6	6.2	6.35		VAR00016	10	3.6	6.8	5.41	0.853034	Rhizome length
10	7	11	21	2.9	1.2	2.3	3.7	5	4.25		VAR00017	10	4.25	9.03	6.671	1.69452	Rhizome diameter
mean value	6.6	10.6	23.4	4.37	1.82	4.12	4.84	5.41	6.671		Valid N (list status)	10
MD3											Summary statistics
	Fibrous root length/cm	Plant height/cm	Leaf number	Leaf blade weight/g	Petiole weight/g	Rhizome weight/g	Fibrous root weight/g	Rhizome length/cm	Rhizome diameter/mm			N	minimal value	maximum value	mean value	standard deviation
1	6	16	18	2	1.75	5.02	0.97	3	7.57		VAR00009	10	6	10	8.2	1.39841	Fibrous root
2	9	16	17	5.75	2.81	6.87	2.07	4.9	7.68		VAR00010	10	13	20	16.2	2.09762	Plant height
3	8	17	23	4.02	3.19	6.69	5.47	5.9	7.48		VAR00011	10	17	46	26.7	8.49902	Leaf number
4	8	13	24	2.8	1.61	5.07	3.75	6.5	7.81		VAR00012	10	1.85	7.42	4.307	1.78976	Leaf blade weigh
5	10	18	28	4.26	2.65	10.05	6.55	7.2	7.78		VAR00013	10	1.61	4.92	2.954	1.1215	Petiole weight
6	10	20	30	6.06	3.44	9.43	6.06	7.2	7.66		VAR00014	10	5.02	13.01	7.711	2.5343	Rhizome weight
7	8	13	31	4.79	2.67	8.57	5.19	6.3	8.31		VAR00015	10	0.97	8.5	5.175	2.29025	Fibrous root weight
8	8	16	20	1.85	1.92	6.08	8.5	7.2	6.74		VAR00016	10	3	7.6	6.14	1.3906	Rhizome length
9	6	17	30	4.12	4.58	6.32	6.64	5.6	7.89		VAR00017	10	6.74	8.31	7.705	0.42167	Rhizome diameter
10	9	16	46	7.42	4.92	13.01	6.55	7.6	8.13		Valid N (list status)	10
mean value	8.2	16.2	26.7	4.307	2.954	7.711	5.175	6.14	7.705
MD4											Summary statistics
	Fibrous root length/cm	Plant height/cm	Leaf number	Leaf blade weight/g	Petiole weight/g	Rhizome weight/g	Fibrous root weight/g	Rhizome length/cm	Rhizome diameter/mm			N	minimal value	maximum value	mean value	standard deviation
1	4	14	17	3.7	2.4	7.3	2.1	5.5	9.47		VAR00009	10	4	10	6.2	2.39444	Fibrous root
2	6	17	66	10.6	8.4	20.7	13.2	7.2	8.97		VAR00010	10	10	22	15.9	3.84274	Plant height
3	7	14	20	3.5	2.4	10.3	6.2	6.5	5.42		VAR00011	10	17	76	44.9	21.9365	Leaf number
4	5	20	74	16.9	13.4	29.4	12.9	6	6.72		VAR00012	10	3.5	18.1	8.64	5.21668	Leaf blade weigh
5	4	10	22	3.6	2.3	17.8	3.6	7	9.59		VAR00013	10	2.3	21.4	7.98	5.92524	Petiole weight
6	9	20	41	8.6	8.8	19.5	14	8.2	9.58		VAR00014	10	7.3	43.7	21.87	10.2484	Rhizome weight
7	9	22	76	18.1	21.4	43.7	15.6	7.5	10.47		VAR00015	10	2.1	19.5	9.78	6.01919	Fibrous root weight
8	10	16	35	6.9	7	26.4	19.5	8	8.57		VAR00016	10	5.5	8.2	6.99	0.831932	Rhizome length
9	4	12	48	6.9	8.8	25.1	7.5	7	7.62		VAR00017	10	5.42	10.47	8.278	1.66251	Rhizome diameter
10	4	14	50	7.6	4.9	18.5	3.2	7	6.37		Valid N (list status)	10
mean value	6.2	15.9	44.9	8.64	7.98	21.87	9.78	6.99	8.278
MD5											Summary statistics
	Fibrous root length/cm	Plant height/cm	Leaf number	Leaf blade weight/g	Petiole weight/g	Rhizome weight/g	Fibrous root weight/g	Rhizome length/cm	Rhizome diameter/mm			N	minimal value	maximum value	mean value	standard deviation
1	8	14	5	1.7	0.6	8.1	8.1	6	12.34		VAR00009	10	4	10	6.8	2.09762	Fibrous root
2	6	15	14	4.1	2	9.5	9	8.2	6.12		VAR00010	10	0	18	13.4	5.23238	Plant height
3	9	14	48	10.9	6.6	17.2	35.2	7	10.95		VAR00011	10	5	65	34.5	18.1797	Leaf number
4	5	12	65	9.8	7.5	41.4	6.8	8.1	9.52		VAR00012	10	1.7	12	6.01	3.63668	Leaf blade weigh
5	5	18	34	5.4	3.4	14.9	4.5	6	9.28		VAR00013	10	0.6	10.6	4.72	3.02794	Petiole weight
6	9	16	36	4.6	4.5	17.7	7.9	6	8.31		VAR00014	10	4.1	44.3	20.19	13.9007	Rhizome weight
7	5	18	43	5.6	5.6	14.1	3.3	5.2	5.75		VAR00015	10	3.3	35.2	10.08	9.47392	Fibrous root weight
8	10	16	51	12	10.6	44.3	15.6	7	12.6		VAR00016	10	5	8.2	6.6	1.13235	Rhizome length
9	4	11	28	4	4.8	30.6	4.5	7.5	9.33		VAR00017	10	5.75	12.6	9.062	2.45689	Rhizome diameter
10	7		21	2	1.6	4.1	5.9	5	6.42		Valid N (list status)	10
mean value	6.8	14.8889	34.5	6.01	4.72	20.19	10.08	6.6	9.062
ML1											Summary statistics
	Fibrous root length/cm	Plant height/cm	Leaf number	Leaf blade weight/g	Petiole weight/g	Rhizome weight/g	Fibrous root weight/g	Rhizome length/cm	Rhizome diameter/mm			N	minimal value	maximum value	mean value	standard deviation
1	6	7	5	0.5	0.1	0.3	0.5	2	5.3		VAR00009	10	4	6	5.05	0.761942	Fibrous root
2	5	6	6	0.3	0.1	0.2	0.4	1.5	4.86		VAR00010	10	6	13	8.55	2.31481	Plant height
3	4.5	8	6	0.1	0.14	0.3	0.3	1.5	4.08		VAR00011	10	4	11	6.7	2.49666	Leaf number
4	4	9	4	0.1	0.3	0.2	0.2	1.3	2.75		VAR00012	10	0.1	1.1	0.44	0.309839	Leaf blade weigh
5	5	9	4	0.3	0.1	0.2	0.7	1.3	4.2		VAR00013	10	0.1	0.5	0.214	0.134015	Petiole weight
6	6	6.5	7	0.4	0.2	0.2	0.5	1.7	4.55		VAR00014	10	0.1	0.4	0.24	0.0843274	Rhizome weight
7	4	13	9	1.1	0.5	0.4	0.5	2	5.37		VAR00015	10	0.2	0.7	0.41	0.152388	Fibrous root weight
8	6	12	10	0.8	0.3	0.2	0.4	2.1	4.46		VAR00016	10	1.2	2.1	1.58	0.348967	Rhizome length
9	5	8	11	0.5	0.3	0.3	0.4	1.2	3.41		VAR00017	10	2.75	5.37	4.232	0.861198	Rhizome diameter
10	5	7	5	0.3	0.1	0.1	0.2	1.2	3.34		Valid N (list status)	10
mean value	5.05	8.55	6.7	0.44	0.214	0.24	0.41	1.58	4.232
ML2
	Fibrous root length/cm	Plant height/cm	Leaf number	Leaf blade weight/g	Petiole weight/g	Rhizome weight/g	Fibrous root weight/g	Rhizome length/cm	Rhizome diameter/mm		Summary statistics
1	9	10	15	1.9	0.8	2.1	2.2	6	4.66			N	minimal value	maximum value	mean value	standard deviation
2	8	11	14	2.7	1.4	5.4	5.1	7.2	8.64		VAR00009	10	7	10	9.2	1.13529	Fibrous root
3	7	12	22	3.9	2	5.7	2.1	4.6	6.69		VAR00010	10	10	20	14.4	3.33999	Plant height
4	10	15	31	5.2	1.6	4.8	5.2	6	7.99		VAR00011	10	14	31	20.5	6.5192	Leaf number
5	10	20	28	9.5	2.8	6.8	6.7	6.6	8.59		VAR00012	10	1.9	9.5	4.72	2.35221	Leaf blade weigh
6	10	18	21	6.7	2.6	9.8	3.9	6.6	9.63		VAR00013	10	0.8	2.8	1.85	0.779245	Petiole weight
7	8	12	14	3	0.8	3.1	2.6	5.4	5.82		VAR00014	10	2.1	9.8	5.49	2.26983	Rhizome weight
8	10	18	17	5.2	2.4	3.9	2.9	6.4	5.32		VAR00015	10	2.1	6.7	3.89	1.48657	Fibrous root weight
9	10	14	15	2.7	1.3	5.4	4.2	6.6	7.04		VAR00016	10	4.6	8.3	6.37	0.995601	Rhizome length
10	10	14	28	6.4	2.8	7.9	4	8.3	8.53		VAR00017	10	4.66	9.63	7.291	1.64644	Rhizome diameter
mean value	9.2	14.4	20.5	4.72	1.85	5.49	3.89	6.37	7.291		Valid N (list status)	10
ML3											Summary statistics
	Fibrous root length/cm	Plant height/cm	Leaf number	Leaf blade weight/g	Petiole weight/g	Rhizome weight/g	Fibrous root weight/g	Rhizome length/cm	Rhizome diameter/mm			N	minimal value	maximum value	mean value	standard deviation
1	13	19	20	9.4	2.9	9.3	17.6	10.7	10.03		VAR00009	10	5	13	9.2	2.82056	Fibrous root
2	10	20	25	12.5	5.7	14.8	21.4	4.9	9.85		VAR00010	10	8	20	13	4.21637	Plant height
3	12	15	18	8.1	3.4	11.8	18.1	6	8.97		VAR00011	10	18	62	30.6	16.0361	Leaf number
4	8	10	26	8.4	3.7	9.4	11.7	4	6.38		VAR00012	10	3.9	12.5	7.67	2.88061	Leaf blade weigh
5	6	10	22	4.8	2.6	9.3	9.9	6.8	8.31		VAR00013	10	2	5.7	3.24	1.06896	Petiole weight
6	7	10	62	11	3.7	15.6	17.4	7	8.38		VAR00014	10	8.3	15.6	10.81	2.53528	Rhizome weight
7	9	10	58	8.1	3.6	10.3	8	5	7.58		VAR00015	10	6.9	21.4	13.26	5.06759	Fibrous root weight
8	9	12	24	6.3	2.7	10.7	13.2	5	7.57		VAR00016	10	4	10.7	6.04	1.88338	Rhizome length
9	5	8	32	3.9	2.1	8.3	6.9	5	5.43		VAR00017	10	5.43	10.03	7.907	1.50088	Rhizome diameter
10	13	16	19	4.2	2	8.6	8.4	6	6.57		Valid N (list status)	10
mean value	9.2	13	30.6	7.67	3.24	10.81	13.26	6.04	7.907
ML4											Summary statistics
	Fibrous root length/cm	Plant height/cm	Leaf number	Leaf blade weight/g	Petiole weight/g	Rhizome weight/g	Fibrous root weight/g	Rhizome length/cm	Rhizome diameter/mm			N	minimal value	maximum value	mean value	standard deviation
1						12.2	3.53	7.8	8.18		VAR00009	9	2	11	6.33333	3.5	须根
2	9	19	64	11.06	10.91	28.75	11.16	5.2	8.31		VAR00010	9	8	19	13.2222	3.7006	株高
3	11	15	41	10.6	7.37	25.69	30.52	8	15.84		VAR00011	9	10	66	40.2222	18.4444	叶片数
4	2	14	52	5	5.68	23.72	5.03	8.2	9.58		VAR00012	9	1.3	11.86	6.58556	4.05801	叶片重
5	6	12	40	5.55	4.46	17.92	17.39	5.6	9.6		VAR00013	9	1.5	10.91	5.41222	3.00695	叶柄重
6	10	14	66	11.86	7.29	28.69	12.23	7.3	7.47		VAR00014	10	7.7	28.75	18.677	7.62406	根茎重
7	9	17	38	8.7	6.5	16.8	11.5	9.2	9.08		VAR00015	10	1.8	30.52	10.076	8.80502	须根重
8	2	12	25	2.7	2.9	10.7	1.8	5	9.07		VAR00016	10	5	9.2	6.84	1.4983	根茎长
9	4	8	10	1.3	2.1	14.6	5	6.9	8.84		VAR00017	10	7.25	15.84	9.322	2.42748	根茎粗
10	4	8	26	2.5	1.5	7.7	2.6	5.2	7.25		Valid N (list status)	9
mean value	6.33333	13.2222	40.2222	6.58556	5.41222	18.677	10.076	6.84	9.322
ML5											Summary statistics
	Fibrous root length/cm	Plant height/cm	Leaf number	Leaf blade weight/g	Petiole weight/g	Rhizome weight/g	Fibrous root weight/g	Rhizome length/cm	Rhizome diameter/mm			N	minimal value	maximum value	mean value	standard deviation
1	6	13	24	3.3	1.6	5.9	2.9	5	8.92		VAR00009	10	5	12	8.2	2.34758	Fibrous root
2	5	12	42	4.4	4.5	7.3	3.8	5	8.17		VAR00010	10	9	19	14.3	3.4335	Plant height
3	6	11	35	4.2	1.5	12.6	3.2	8	10.06		VAR00011	10	22	67	45.1	16.455	Leaf number
4	6	9	32	2.3	1.4	7.8	2	4.3	12.06		VAR00012	10	2.3	11.8	7.15	3.59274	Leaf blade weigh
5	8	18	22	5.7	3.3	9.3	5.8	5.7	11.1		VAR00013	10	1.4	10.4	4.798	3.14735	Petiole weight
6	10	18	66	11.8	10.4	26.5	15.5	8	13.23		VAR00014	10	5.9	26.5	15.786	7.96174	Rhizome weight
7	10	19	53	10.4	7.9	21.1	16	5.8	7.11		VAR00015	10	2	16	7.097	5.02271	Fibrous root weight
8	10	13	67	7.8	4.5	24.4	5.3	6.5	9.36		VAR00016	10	4.3	9	6.43	1.54276	Rhizome length
9	12	13	55	10.48	4.48	22.64	8.13	7	12.49		VAR00017	10	7.11	13.23	10.17	1.99216	Rhizome diameter
10	9	17	55	11.12	8.4	20.32	8.34	9	9.2		Valid N (list status)	10
mean value	8.2	14.3	45.1	7.15	4.798	15.786	7.097	6.43	10.17
