# Supplementary material for: Effects of growing Coptis chinensis Franch in the natural understory vs. under a manmade scaffold on its growth, alkaloid contents, and rhizosphere soil microenvironment
Source: PeerJ. 2022 Jul 20;10:e13676. doi: 10.7717/peerj.13676 (PMC9308463; doi:10.7717/peerj.13676)
Supplement: Supplemental Information 3 [file peerj-10-13676-s003.xlsx]

## Sheet: 1
	Jatrorrhizine%	magnoflorine%	columbamine%	Epiberberine%	Coptisine%	Palmatine%	Berberine%
ML2-1	0.794851	0.385675	0.970061	5.29721	1.61206	1.65322	5.38278
ML2-2	0.789101	0.365862	0.981221	5.2821	1.64262	1.65405	5.39434
ML2-3	0.772041	0.385769	0.982845	5.33411	1.62648	1.66239	5.40617
mean value	0.785331	0.379102	0.978043	5.30447	1.62705	1.65656	5.39443
MD2-1	0.786594	0.369737	1.14813	5.33668	1.67759	1.83351	6.9238
MD2-2	0.798323	0.368706	1.1403	5.35876	1.65926	1.82781	7.02145
MD2-3	0.78848	0.358769	1.17821	5.56658	1.73273	1.89017	7.1779
mean value	0.791132	0.365737	1.15555	5.42067	1.68986	1.8505	7.04105
ML3-1	0.854948	0.345144	0.954754	4.92884	1.72982	1.67953	5.78726
ML3-2	0.849537	0.353925	0.865965	4.82198	1.95103	1.71268	5.82177
ML3-3	0.855112	0.349237	0.977661	4.80649	1.95444	1.71721	5.79389
mean value	0.853199	0.349435	0.932793	4.85243	1.87843	1.70314	5.80097
MD3-1	0.853541	0.350675	0.950266	4.92778	1.93861	1.70527	5.73933
MD3-2	0.844809	0.361112	0.953287	4.89114	1.90382	1.69642	5.79768
MD3-3	0.858166	0.365456	0.956476	4.98452	1.93735	1.71934	5.80837
mean value	0.852172	0.359081	0.953343	4.93448	1.92659	1.70701	5.78179
ML4-1	0.813351	0.4213	1.03894	4.985	1.8431	1.74008	6.18477
ML4-2	0.849334	0.410238	0.81953	4.71877	1.87177	1.72883	6.20065
ML4-3	0.815059	0.410363	0.966979	4.76139	1.99141	1.72938	6.42255
mean value	0.825915	0.413967	0.941817	4.82172	1.90209	1.73276	6.26932
MD4-1	0.814659	0.362269	1.10899	4.76007	1.96196	1.74904	6.33288
MD4-2	0.792001	0.389925	1.09123	4.73426	1.94694	1.73835	6.31932
MD4-3	0.818276	0.347675	1.08572	4.70207	1.92358	1.73169	6.26866
mean value	0.808312	0.366623	1.09531	4.73213	1.94416	1.73969	6.30696
MD5-1	0.777051	0.505081	0.904015	4.82074	1.78802	1.5362	6.4635
MD5-2	0.797769	0.510612	0.904558	4.82183	1.83349	1.55461	6.57362
MD5-3	0.804405	0.5093	0.905105	4.81763	1.8229	1.55025	6.50551
mean value	0.793075	0.508331	0.904559	4.82007	1.8148	1.54702	6.51421
MD5-1	0.809805	0.369488	1.01188	5.15691	1.78608	1.61832	5.94926
MD5-2	0.781234	0.42305	0.986795	5.03652	1.74417	1.5848	5.82516
MD5-3	0.784409	0.346487	0.998241	5.14094	1.76034	1.60371	5.90503
mean value	0.791816	0.379675	0.998973	5.11146	1.76353	1.60228	5.89315
Note: ML1–ML5: 1–5-year-old C. chinensis in natural understory; MD1–MD5: 1–5-year-old C. chinensis on manmade scaffold. The same below.
ML2
Summary statistics
	N	minimal value	maximum value	mean value	standard deviation
VAR00001	3	0.772041	0.794851	0.785331	0.0118635
VAR00002	3	0.365862	0.385769	0.379102	0.0114659
VAR00003	3	0.970061	0.982845	0.978043	0.00695948
VAR00004	3	5.2821	5.33411	5.30447	0.0267506
VAR00005	3	1.61206	1.64262	1.62705	0.0152893
VAR00006	3	1.65322	1.66239	1.65656	0.00507253
VAR00007	3	5.38278	5.40617	5.39443	0.0116949
Valid N (list status)	3
MD2
Summary statistics
	N	minimal value	maximum value	mean value	standard deviation
VAR00001	3	0.786594	0.798323	0.791132	0.00629811
VAR00002	3	0.358769	0.369737	0.365738	0.0060571
VAR00003	3	1.1403	1.17821	1.15555	0.0200139
VAR00004	3	5.33668	5.56658	5.42067	0.126839
VAR00005	3	1.65926	1.73273	1.68986	0.0382399
VAR00006	3	1.82781	1.89017	1.8505	0.0344733
VAR00007	3	6.9238	7.1779	7.04105	0.128179
Valid N (list status)	3
ML3
Summary statistics
	N	minimal value	maximum value	mean value	standard deviation
VAR00001	3	0.849537	0.855112	0.853199	0.00317237
VAR00002	3	0.345144	0.353925	0.349435	0.00439397
VAR00003	3	0.865965	0.977661	0.932793	0.0589975
VAR00004	3	4.80649	4.92884	4.85243	0.0666179
VAR00005	3	1.72982	1.95444	1.87843	0.128709
VAR00006	3	1.67953	1.71721	1.70314	0.0205759
VAR00007	3	5.78726	5.82177	5.80097	0.0183103
Valid N (list status)	3
MD3
Summary statistics
	N	minimal value	maximum value	mean value	standard deviation
VAR00001	3	0.844809	0.858166	0.852172	0.006783
VAR00002	3	0.350675	0.365456	0.359081	0.00759709
VAR00003	3	0.950266	0.956476	0.953343	0.00310538
VAR00004	3	4.89114	4.98452	4.93448	0.0470498
VAR00005	3	1.90382	1.93861	1.92659	0.0197301
VAR00006	3	1.69642	1.71934	1.70701	0.0115585
VAR00007	3	5.73933	5.80837	5.78179	0.0371612
Valid N (list status)	3
ML4
Summary statistics
	N	minimal value	maximum value	mean value	standard deviation
VAR00001	3	0.813351	0.849334	0.825915	0.0202994
VAR00002	3	0.410237	0.4213	0.413967	0.00635116
VAR00003	3	0.81953	1.03894	0.941817	0.11185
VAR00004	3	4.71877	4.985	4.82172	0.142998
VAR00005	3	1.8431	1.99141	1.90209	0.0786671
VAR00006	3	1.72883	1.74008	1.73276	0.00634303
VAR00007	3	6.18477	6.42255	6.26932	0.132934
Valid N (list status)	3
MD4
Summary statistics
	N	minimal value	maximum value	mean value	standard deviation
VAR00001	3	0.792001	0.818276	0.808312	0.0142408
VAR00002	3	0.347675	0.389925	0.366623	0.0214589
VAR00003	3	1.08572	1.10899	1.09531	0.0121568
VAR00004	3	4.70207	4.76007	4.73213	0.0290612
VAR00005	3	1.92358	1.96196	1.94416	0.0193411
VAR00006	3	1.73169	1.74904	1.73969	0.00875249
VAR00007	3	6.26866	6.33288	6.30696	0.0338469
Valid N (list status)	3
ML5
Summary statistics
	N	minimal value	maximum value	mean value	standard deviation
VAR00001	3	0.777051	0.804405	0.793075	0.0142681
VAR00002	3	0.505081	0.510613	0.508331	0.00289008
VAR00003	3	0.904015	0.905105	0.904559	0.000545002
VAR00004	3	4.81763	4.82183	4.82007	0.00218094
VAR00005	3	1.78802	1.83349	1.8148	0.0237937
VAR00006	3	1.5362	1.55461	1.54702	0.00962433
VAR00007	3	6.4635	6.57362	6.51421	0.0555741
Valid N (list status)	3
MD5
Summary statistics
	N	minimal value	maximum value	mean value	standard deviation
VAR00001	3	0.781234	0.809805	0.791816	0.0156599
VAR00002	3	0.346488	0.42305	0.379675	0.0392848
VAR00003	3	0.986795	1.01188	0.998973	0.0125604
VAR00004	3	5.03652	5.15691	5.11146	0.0653857
VAR00005	3	1.74418	1.78608	1.76353	0.0211324
VAR00006	3	1.5848	1.61832	1.60228	0.0168045
VAR00007	3	5.82516	5.94926	5.89315	0.0628973
Valid N (list status)	3
	Jatrorrhizine%						columbamine%						Coptisine%						Berberine%
	treatment	mean value	5% difference	1%difference			treatment	mean value	5% difference	1%difference			treatment	mean value	5% difference	1%difference			treatment	mean value	5% difference	1%difference
ML3	treatment3	0.85	a	A		MD2	treatment2	1.16	a	A		MD4	treatment6	1.94	a	A		二年棚下	treatment2	7.04	a	A
MD3	treatment4	0.85	a	A		MD4	treatment6	1.1	a	AB		MD3	treatment4	1.93	a	A		五年林下	treatment7	6.51	b	B
ML4	treatment5	0.83	b	AB		MD5	treatment8	1	b	BC		ML4	treatment5	1.9	ab	AB		四年棚下	treatment6	6.31	c	C
MD4	treatment6	0.81	bc	BC		ML2	treatment1	0.98	bc	C		ML3	treatment3	1.88	ab	AB		四年林下	treatment5	6.27	c	C
ML5	treatment7	0.79	c	C		MD3	treatment4	0.95	bc	C		ML5	treatment7	1.81	bc	ABC		五年棚下	treatment8	5.89	d	D
MD5	treatment8	0.79	c	C		ML4	treatment5	0.94	bc	C		MD5	treatment8	1.76	cd	BCD		三年林下	treatment3	5.8	d	D
MD2	treatment2	0.79	c	C		ML3	treatment3	0.93	bc	C		MD2	treatment2	1.69	de	CD		三年棚下	treatment4	5.78	d	D
ML2	treatment1	0.79	c	C		ML5	treatment7	0.9	c	C		ML2	treatment1	1.63	e	D		二年林下	treatment1	`	e	E
	magnoflorine%						Epiberberine%						Palmatine%
	treatment	mean value	5% difference	1%difference			treatment	mean value	5% difference	1%difference			treatment	mean value	5% difference	1%difference
ML5	treatment7	0.51	a	A		MD2	treatment2	5.42	a	A		MD2	treatment2	1.85	a	A
ML4	treatment5	0.41	b	B		ML2	treatment1	5.3	a	A		MD4	treatment6	1.74	b	B
MD5	treatment8	0.38	c	BC		MD5	treatment8	5.11	b	B		ML4	treatment5	1.73	bc	B
ML2	treatment1	0.38	c	BC		MD3	treatment4	4.93	c	BC		MD3	treatment4	1.71	c	B
MD4	treatment6	0.37	c	C		ML3	treatment3	4.85	cd	C		ML3	treatment3	1.7	c	B
MD2	treatment2	0.37	c	C		ML4	treatment5	4.82	cd	C		ML2	treatment1	1.66	d	C
MD3	treatment4	0.36	c	C		ML5	treatment7	4.82	cd	C		MD5	treatment8	1.6	e	D
ML3	treatment3	0.35	c	C		MD4	treatment6	4.73	d	C		ML5	treatment7	1.55	f	E
